# Supplementary material for: Double solvent synthesis of ultrafine Pt nanoparticles supported on halloysite nanotubes for chemoselective cinnamaldehyde hydrogenation
Source: Royal Society of Chemistry journal article supplement (doi:10.1039/d2dt03600b), 2023-01-01
Supplement: d2dt03600b1.pdf [file d2dt03600b1.pdf]

**Electronic Supplementary Information (ESI) for:**

**Double solvent synthesis of ultrafine Pt nanoparticles supported on halloysite nanotubes for chemoselective cinnamaldehyde hydrogenation**

Rongqian Cui,<sup>a</sup> Jiaqi Zhou,<sup>a</sup> Dan Wang,<sup>a</sup> Yafei Zhao,<sup>a</sup> Xu Xiang,<sup>b</sup> Huishan Shang<sup>\*a</sup> and Bing Zhang<sup>\*a</sup>

<sup>a</sup>School of Chemical Engineering, Zhengzhou University, Zhengzhou 450001, P.R. China

<sup>b</sup>State Key Laboratory of Chemical Resource Engineering, Beijing University of Chemical Technology, Beijing 100029, P.R. China

\*Corresponding Author. E-mail address: shanghs@zzu.edu.cn; zhangb@zzu.edu.cn

The conversion and selectivity<sup>1</sup> were calculated from Eqs. (1–5), which are:

$$\text{Conversion of CMA} = \text{reacted CMA} / \text{CMA (in)} \quad (1)$$

$$\text{Selectivity of CMO} = \text{CMO (in)} / \text{reacted CMA} \quad (2)$$

$$\text{Selectivity of HCMA} = \text{HCMA (in)} / \text{reacted CMA} \quad (3)$$

$$\text{Selectivity of HCMO} = \text{HCMO (in)} / \text{reacted CMA} \quad (4)$$

$$\text{Reaction rate (h}^{-1}\text{)} = \frac{n_{\text{CMA}}}{n_{\text{Pt}} t} \times \text{conversion/time (h)} \quad (5)$$

where  $n_{\text{CMA}}$  represents the moles of CMA in the mixture, and  $n_{\text{Pt}}$  is the moles of Pt used in the reaction.

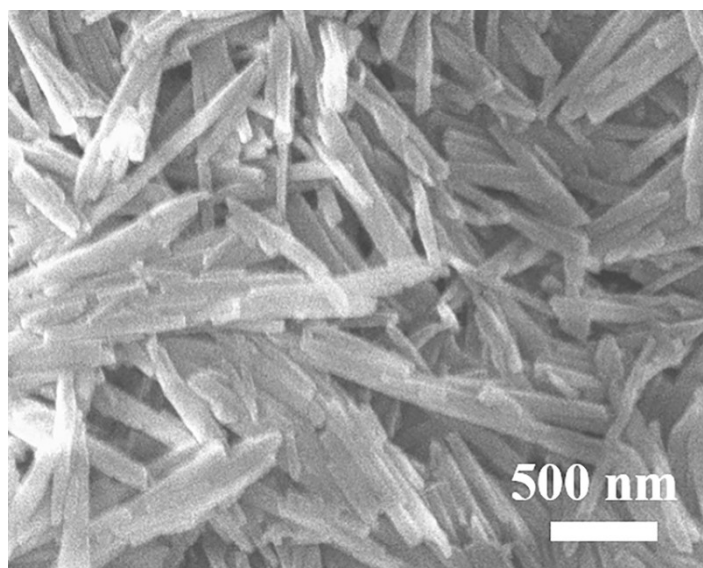

**Fig. S1** SEM image of Pt/HNTs

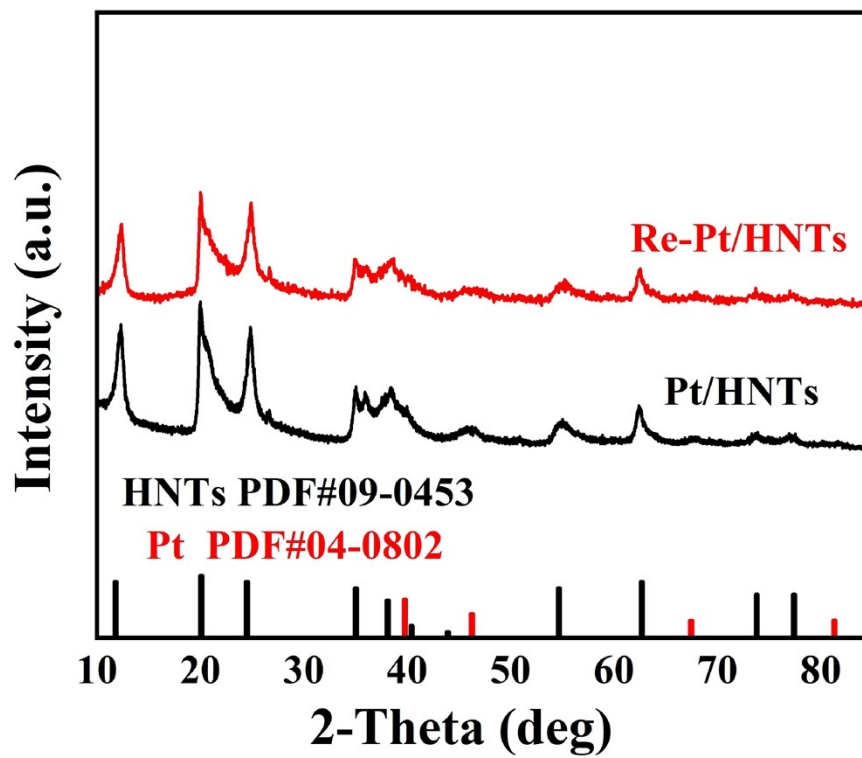

Fig. S2 The XRD patterns of Pt/HNTs and after four recycle

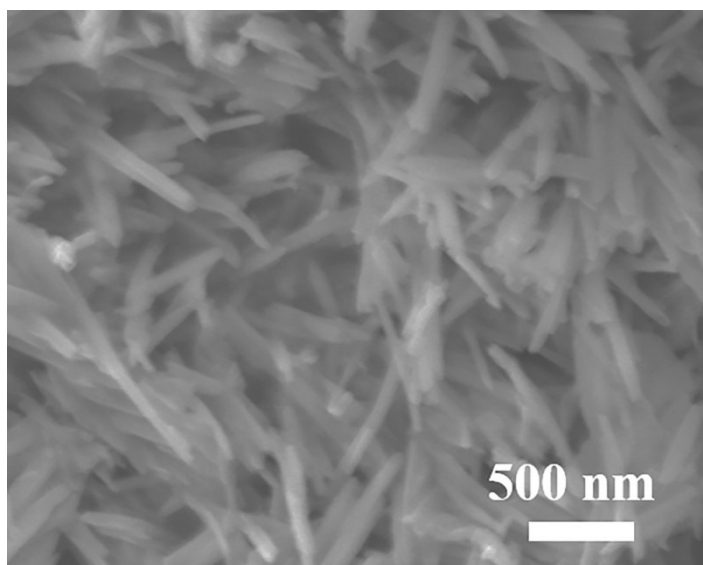

**Fig. S3** SEM image of the recycled Pt/HNTs.

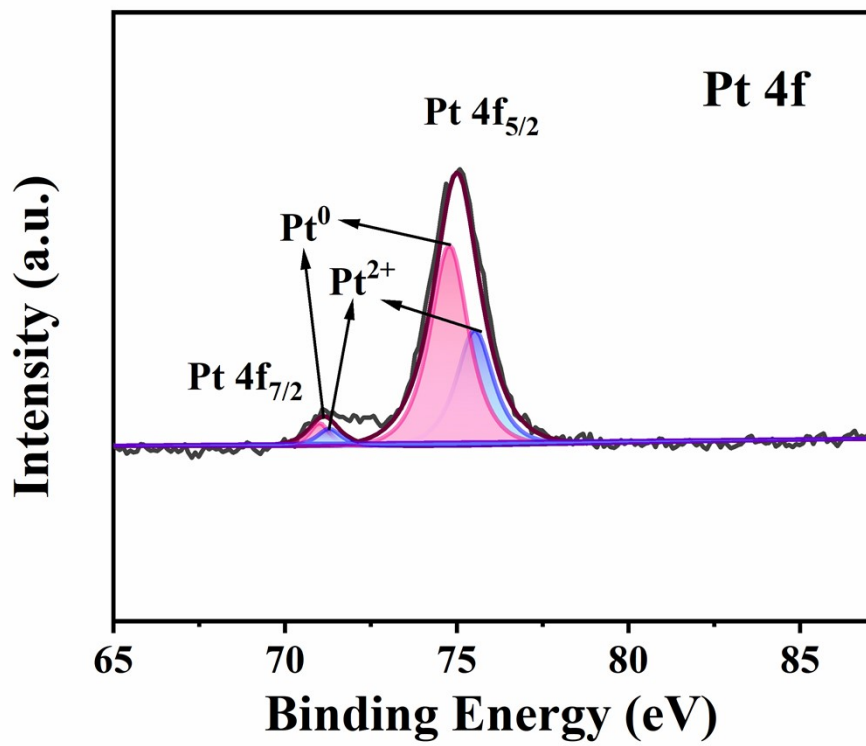

Fig. S4 XPS spectra of the Pt/HNTs catalysts after the fourth use.

Table S1. Influence of temperature on hydrogenation of CMA over 3.8 wt% Pt/HNTs.

| Temperature (°C) | Conversion (%) | Selectivity (%) |      |      |
|------------------|----------------|-----------------|------|------|
|                  |                | CMO             | HCMA | HCMO |
| 50               | 32.7           | 81.4            | 9.6  | 9.0  |
| 60               | 51.7           | 87.8            | 8.1  | 4.1  |
| 70               | 69.2           | 88.4            | 6.0  | 5.6  |
| 80               | 94.1           | 95.1            | 2.5  | 2.4  |
| 90               | 93.9           | 85.3            | 5.0  | 9.7  |

Reaction conditions: 5 mmol substrate, reaction time = 2 h,  $H_2$  = 2 MPa, 12.5 mL ethanol, stirring speed = 800 rpm. Selectivity is reported at the level of conversion in the table.

Table S2. Influence of reaction time on hydrogenation of CMA over 3.8 wt% Pt/HNTs.

| Reaction Time (h) | Conversion (%) | Selectivity (%) |      |      |
|-------------------|----------------|-----------------|------|------|
|                   |                | CMO             | HCMA | HCMO |
| 0.5               | 44.4           | 88.5            | 8.1  | 3.4  |
| 1.0               | 61.8           | 89.5            | 6.8  | 3.7  |
| 1.5               | 79.6           | 91.9            | 4.8  | 3.3  |
| 2.0               | 94.1           | 95.1            | 2.5  | 2.4  |
| 2.5               | 91.8           | 75.0            | 4.7  | 20.3 |

Reaction conditions: 5 mmol substrate, temperature = 80 °C, H<sub>2</sub> = 2 MPa, 12.5 mL ethanol, stirring speed = 800 rpm. Selectivity is reported at the level of conversion in the table.



Table S3. Influence of H<sub>2</sub> pressure on hydrogenation of CMA over 3.8 wt% Pt/HNTs.

| H <sub>2</sub> (MPa) | Conversion (%) | Selectivity (%) |      |      |
|----------------------|----------------|-----------------|------|------|
|                      |                | CMO             | HCMA | HCMO |
| 0.5                  | 46.8           | 86.1            | 10.0 | 3.9  |
| 1.0                  | 73.3           | 86.4            | 8.3  | 5.3  |
| 1.5                  | 74.1           | 88.0            | 7.2  | 4.8  |
| 2.0                  | 94.1           | 95.1            | 2.5  | 2.4  |
| 2.5                  | 94.5           | 82.6            | 5.9  | 11.5 |

Reaction conditions: 5 mmol substrate, temperature = 80 °C, reaction time = 2 h, 12.5 mL ethanol, stirring speed = 800 rpm. Selectivity is reported at the level of conversion in the table.

Table S4. Effect of percentage metal loading on hydrogenation of CMA.

| Pt (wt%) | Conversion (%) | Selectivity (%) |      |      |
|----------|----------------|-----------------|------|------|
|          |                | CMO             | HCMA | HCMO |
| 1.5      | 44.7           | 84.6            | 10.7 | 4.7  |
| 2.3      | 57.3           | 87.3            | 8.4  | 4.3  |
| 3.0      | 63.0           | 87.9            | 7.5  | 4.6  |
| 3.8      | 94.1           | 95.1            | 2.5  | 2.4  |
| 4.6      | 93.0           | 93.0            | 3.7  | 3.3  |

Reaction conditions: 5 mmol substrate, temperature = 80 °C, reaction time = 2 h, H<sub>2</sub> = 2 MPa, 12.5 mL ethanol, stirring speed = 800 rpm. Selectivity is reported at the level of conversion in the table.

Table S5. Influence of solvents on hydrogenation of CMA over 3.8 wt% Pt/HNTs.

| Solvents    | Conversion (%) | Selectivity (%) |      |      | CMO yield (%) |
|-------------|----------------|-----------------|------|------|---------------|
|             |                | CMO             | HCMA | HCMO |               |
| Cyclohexane | 45.0           | 68.0            | 18.7 | 13.3 | 30.6          |
| Isopropanol | 56.7           | 78.7            | 11.5 | 9.8  | 44.6          |
| Methanol    | 78.8           | 90.9            | 5.7  | 3.4  | 71.7          |
| Ethanol     | 94.1           | 95.1            | 2.5  | 2.4  | 89.5          |

Reaction conditions: 5 mmol substrate, temperature = 80 °C, H<sub>2</sub> = 2 MPa, reaction time = 2 h, stirring speed = 800 rpm. Selectivity is reported at the level of conversion in the table, yield = conversion (%) × selectivity (%).

Table S6. Recycle times on hydrogenation of CMA over 3.8 wt% Pt/HNTs.

| Recycle times | CMA Conversion (%) | Selectivity (%) |      |      |
|---------------|--------------------|-----------------|------|------|
|               |                    | CMO             | HCMA | HCMO |
| 1             | 94.1               | 95.1            | 2.5  | 2.4  |
| 2             | 92.8               | 95.8            | 1.8  | 2.4  |
| 3             | 91.0               | 95.4            | 2.7  | 1.9  |
| 4             | 89.3               | 94.0            | 3.0  | 3.0  |
| 5             | 87.2               | 91.0            | 5.6  | 3.4  |
| 6             | 81.0               | 87.6            | 7.5  | 4.9  |

Reaction conditions: 5 mmol substrate, temperature = 80 °C, reaction time = 2 h, H<sub>2</sub> = 2 MPa, 12.5 mL ethanol, stirring speed = 800 rpm. Selectivity is reported at the level of conversion in the table.

Table S7. Catalytic results reported recently for hydrogenation of CMA to CMO on supported Pt catalysts.

| Catalyst                                       | Solvents    | Pt<br>(wt%) | Tem.<br>(°C) | P <sub>H2</sub><br>(MPa) | T<br>(h) | Conv.<br>(%) | Sel.<br>(%) | Ref.      |
|------------------------------------------------|-------------|-------------|--------------|--------------------------|----------|--------------|-------------|-----------|
| Pt/HNTs                                        | ethanol     | 3.8         | 80           | 2                        | 2        | 94.1         | 95.1        | This work |
| Pt@UiO-66-NH <sub>2</sub>                      | methanol    | 10.7        | 25           | 4                        | 44       | 98.7         | 91.7        | 2         |
| Pt/CeO <sub>2</sub>                            | ethanol     | 3.5         | 70           | 2                        | 6        | 81.9         | 27.6        | 3         |
| Pt@CeO <sub>2</sub>                            | ethanol     | 2.9         | 70           | 2                        | 6        | 63.4         | 69.5        | 3         |
| Pt@Y                                           | isopropanol | 0.6         | 130          | 3                        | 13       | 100          | 91.0        | 4         |
| Pt/U-720                                       | methanol    | 2.0         | 50           | 4                        | 3        | 90.9         | 89.1        | 5         |
| Pt/MOF-NH <sub>2</sub>                         | isopropanol | 2.9         | 60           | 1                        | 3        | 72.3         | 78.9        | 6         |
| Pt@S-1                                         | isopropanol | 0.22        | 60           | 1                        | 4        | 99.8         | 98.7        | 7         |
| Pt/S-1                                         | isopropanol | 0.17        | 60           | 1                        | 4        | 99.9         | 0.1         | 7         |
| Pt@S-1-is                                      | isopropanol | 0.26        | 60           | 1                        | 4        | 43.9         | 31.9        | 7         |
| Pt30/Al <sub>2</sub> O <sub>3</sub>            | ethanol     | 0.99        | 60           | 2                        | 8        | 85.0         | 47.0        | 8         |
| Pt/PCT_1                                       | ethanol     | 1.6         | 80           | 0.2                      | 3        | 46.5         | 42.9        | 9         |
| Pt/PCT_2                                       | ethanol     | 1.6         | 80           | 0.2                      | 3        | 97.8         | 51.9        | 9         |
| (Pt-enriched cage)@CeO <sub>2</sub> core@shell | ethanol     | 19.2        | 60           | 1                        | 5        | 95.0         | 87.0        | 10        |

## References

- 1 R. Li, W. Yao, Y. Jin, W. Jia, X. Chen, J. Chen, J. Zheng, Y. Hu, D. Han and J. Zhao, *Chem. Eng. J.*, 2018, **351**, 995-1005.
- 2 Z. Guo, C. Xiao, R. V. Maligal-Ganesh, L. Zhou, T. W. Goh, X. Li, D. Tesfagaber, A. Thiel and W. Huang, *ACS Catal.*, 2014, **4**, 1340-1348.
- 3 L. Wang, R. Han, Y. Ma, M. S. Duyar, W. Liu and J. Liu, *J. Phys. Chem. C*, 2021, **125**, 22603-22610.
- 4 X. Deng, B. Qin, R. Liu, X. Qin, W. Dai, G. Wu, N. Guan, D. Ma and L. Li, *J. Am. Chem. Soc.*, 2021, **143**, 20898-20906.
- 5 R. Geng, H. Jia, Y. Xie, D. Pan, F. Yu and B. Fan, *Microporous Mesoporous Mater.*, 2022, **338**, 111968.
- 6 M. Zahid, A. Ismail, M. Sohail and Y. Zhu, *J. Colloid Interface Sci.*, 2022, **628**, 141-152.
- 7 C. Liu, P. Zhu, J. Wang, H. Liu and X. Zhang, *Chem. Eng. J.* 2022, **446**, 137064.
- 8 Q. Hu, S. Wang, Z. Gao, Y. Li, Q. Zhang, Q. Xiang, and Y. Qin, *Appl. Catal. B*, 2017, **218**, 591-599.
- 9 Z. Gu, L. Chen, X. Li, L. Chen, Y. Zhang and C. Duan, *Chem. Sci.*, 2019, **10**, 2111-2117.
- 10 S. Song, X. Liu, J. Li, J. Pan, F. Wang, Y. Xing, X. Wang, X. Liu and H. Zhang, *Adv. Mater.*, 2017, **29**, 1700495.
